# Supplementary material for: Enhanced catalytic performance for toluene combustion via Ce-doped α-MnO2: efficient balance between toluene adsorption and activation oxidation
Source: Royal Society of Chemistry journal article supplement (doi:10.1039/d4cy00357h), 2024-01-01
Supplement: d4cy00357h1.pdf [file d4cy00357h1.pdf]

## Electronic Supplementary Information

### Enhanced catalytic performance for toluene combustion via Ce-doped $\alpha$ -MnO<sub>2</sub>: efficient balance between toluene adsorption and activation oxidation

Yongli Dong<sup>a,‡</sup>, Shuo Li<sup>a,‡</sup>, Chaoqun Chen<sup>a,‡</sup>, Weina Song<sup>a,\*</sup>, Xinglong Li<sup>a</sup>, Fan Wang<sup>a</sup>, Lina Ma<sup>a</sup>,  
Xiaotong Wang<sup>a</sup>, Wei Li<sup>b,\*</sup>

<sup>a</sup> *School of Environmental and Chemical Engineering, Heilongjiang University of Science and  
Technology, Harbin 150022, PR China*

<sup>b</sup> *Department of Chemistry, Fudan University, Shanghai 200433, PR China*

<sup>‡</sup> *These authors make equal contribution to this work.*

<sup>\*</sup> *Corresponding Author: [weinasong@163.com](mailto:weinasong@163.com) (W. N. Song), [weilichem@fudan.edu.cn](mailto:weilichem@fudan.edu.cn) (W. Li).*

## Supplemental Data Items

### 1. Materials

Manganese sulfate monohydrate ( $\text{MnSO}_4 \cdot \text{H}_2\text{O}$ , AR) was purchased from Bodi Chemical Co., Ltd., Tianjin, China. Ethanol glycol (AR) was purchased from Sinopharm Chemical Reagent Co. Ltd., Shanghai, China. Toluene (AR) and potassium permanganate ( $\text{KMnO}_4$ , AR) were purchased from Kemiou Chemical Reagent Co. Ltd., Tianjin, China. Ammonium ceric nitrate ( $\text{Ce}(\text{NH}_4)_2(\text{NO}_3)_6$ , AR) was purchased from Aladdin, Shanghai, China.

### 2. Experimental

$\text{N}_2$  adsorption-desorption isothermals were recorded on a Micromeritics Tristar 2420 instrument at 77 K, before measurements, each sample was degassed at 180 °C for 6 h. The Brunauer-Emmett-Teller (BET) method was used to calculate the specific surface areas. The pore size distributions were derived from the desorption branches based on Barrett-Joyner-Halenda (BJH) model. Temperature programmed reduction with  $\text{H}_2$  ( $\text{H}_2$ -TPR) was performed by a TP-5080 adsorption analyzer (Xianquan) equipped with a thermal conductivity detector. Typically, the sample (30 mg) was packed into the reactor and degassed at 300 °C for 1 h with an Ar gas flow, then the sample was cooled down to the room temperature, and the gas flow was shifted to a mixture of 5 vol.%  $\text{H}_2/\text{N}_2$  (30 mL  $\text{min}^{-1}$ ), then the reactor was carried out by raising the temperature from 30 to 700 °C at a heating rate of 10 °C  $\text{min}^{-1}$ .

Temperature-programmed desorption of oxygen ( $\text{O}_2$ -TPD) was conducted on a TP-5080 adsorption analyzer with a quadrupole mass detector (HIDEN QGA). At first, the  $\text{MnO}_x$  and Ce- $\text{MnO}_2$ -EG catalyst (30 mg) was packed into the reactor and pre-treated under  $\text{O}_2$  atmosphere (30 mL  $\text{min}^{-1}$ ) at 300 °C for 60 min, and then cooled down to 30 °C. Then the reactor was purged by He for 60 min. Finally, the TPD experiment was took under a He flow (30 mL  $\text{min}^{-1}$ ) from 30 to 850 °C upon a rate 10 °C  $\text{min}^{-1}$ .

Temperature-programmed surface reaction of toluene in He atmosphere (without O<sub>2</sub>) (C<sub>7</sub>H<sub>8</sub>-TPSR (He)) were carried out on a TP-5080 adsorption analyzer with a quadrupole mass detector (HIDEN QGA). At first, the MnO<sub>x</sub> and Ce-MnO<sub>2</sub>-EG catalyst (30 mg) was packed into the reactor, after the pretreatment in He at 300 °C for 60 min it was cooled to 30 °C. Then the mixture gas of toluene/He was introduced into reactor for 10 min, and then the reactor was purged by He for 60 min. Finally, the TPSR experiment was took under a He flow (30 mL min<sup>-1</sup>) from 30 to 850 °C upon a rate 10 °C min<sup>-1</sup>. The signal was detected by a mass spectrometer (MS) at mass-to-charge (m/z) ratios of 44 (CO<sub>2</sub>) and 92 (toluene).

C<sub>7</sub>H<sub>8</sub>-TPSR (He+O<sub>2</sub>) were carried out on a TP-5080 adsorption analyzer with a quadrupole mass detector (HIDEN QGA). At first, the MnO<sub>x</sub> and Ce-MnO<sub>2</sub>-EG catalyst (30 mg) was packed into the reactor, after the pretreatment in He at 300 °C for 60 min it was cooled to 30 °C. Then the mixture gas of toluene/He was introduced into reactor for 10 min, and then the reactor was purged by He for 30 min. Finally, the TPSR experiment was took under a O<sub>2</sub>/He (20 vol.%) flow (30 mL min<sup>-1</sup>) from 30 to 850 °C upon a rate 10 °C min<sup>-1</sup>. The signal was detected by a mass spectrometer (MS) at mass-to-charge (m/z) ratios of 44 (CO<sub>2</sub>) and 92 (toluene).

**Table S1**

The desorption peak areas of O<sub>α</sub>-M species, consumption peak areas of O<sub>α</sub>-M and CO<sub>2</sub> product peak areas calculated based on the C<sub>7</sub>H<sub>8</sub>-TPSR curve.

| Sample                  | O <sub>α</sub> -M <sup>a</sup> | Consumption of O <sub>α</sub> -M <sup>b</sup> | CO <sub>2</sub> product peak area <sup>c</sup> |
|-------------------------|--------------------------------|-----------------------------------------------|------------------------------------------------|
| MnO <sub>2</sub> -HT    | 4370                           | -                                             | 75                                             |
| MnO <sub>2</sub> -RP    | 1055                           | 134                                           | 268                                            |
| MnO <sub>2</sub> -EG    | 685                            | 181                                           | 422                                            |
| Ce-MnO <sub>2</sub> -EG | 969                            | 240                                           | 769                                            |

<sup>a</sup> The peak areas of O<sub>α</sub>-M species were calculated based on the O<sub>2</sub>-TPD curves.

<sup>b</sup> The consumption peak areas of O<sub>α</sub>-M species were calculated based on the O<sub>2</sub>-TPD and C<sub>7</sub>H<sub>8</sub>-TPSR curves (TCD signal) from 450 to 700 °C.

<sup>c</sup> The product peak areas of CO<sub>2</sub> were calculated based on the C<sub>7</sub>H<sub>8</sub>-TPSR curves (TCD signal) from 200 to 400 °C.

**Table S2**

Catalytic activities of toluene combustion over different catalysts reported in the literature.

| Catalysts                                               | Synthesis method                                                    | Oxidation conditions |                                           | Toluene conversion   |                      | Reference |
|---------------------------------------------------------|---------------------------------------------------------------------|----------------------|-------------------------------------------|----------------------|----------------------|-----------|
|                                                         |                                                                     | Toluene (ppm)        | Space velocity                            | T <sub>50</sub> (°C) | T <sub>90</sub> (°C) |           |
| $\alpha$ -MnO <sub>2</sub>                              | hydrothermal                                                        | 1000                 | 50000 mL g <sup>-1</sup> h <sup>-1</sup>  | 215                  | 228                  | [1]       |
| MnO <sub>2</sub>                                        | H <sub>2</sub> O <sub>2</sub> reduction                             | 1000                 | 60000 mL g <sup>-1</sup> h <sup>-1</sup>  | 255                  | 267                  | [2]       |
| Mn <sub>2</sub> O <sub>3</sub>                          | Redox precipitation                                                 | 1000                 | 20000 mL g <sup>-1</sup> h <sup>-1</sup>  | 241                  | 250                  | [3]       |
| $\alpha$ -MnO <sub>2</sub> / $\delta$ -MnO <sub>2</sub> | decomposition method                                                | 1000                 | 20000 mL g <sup>-1</sup> h <sup>-1</sup>  | 205                  | 213                  | [4]       |
| Mn <sub>3</sub> O <sub>4</sub>                          | solution combustion strategy                                        | 1000                 | 19100 h <sup>-1</sup>                     | 225                  | 256                  | [5]       |
| MnO <sub>x</sub> -I                                     | redox coprecipitation method                                        | 1000                 | 40000 mL g <sup>-1</sup> h <sup>-1</sup>  | 219                  | 223                  | [6]       |
| MnO <sub>x</sub> /AC-0.3                                | in-situ redox precipitation                                         | 1000                 | 20000 mL g <sup>-1</sup> h <sup>-1</sup>  | 184                  | 193                  | [7]       |
| Mn <sub>2</sub> O <sub>3</sub> @MnO <sub>2</sub>        | redox-induced H <sup>+</sup> /KMnO <sub>4</sub><br>treatment method | 1000                 | 60000 mL g <sup>-1</sup> h <sup>-1</sup>  | 235                  | 252                  | [8]       |
| MnO <sub>x</sub>                                        | starch paste-assisted method                                        | 1000                 | 60000 mL g <sup>-1</sup> h <sup>-1</sup>  | 250                  | 285                  | [9]       |
| MnCo <sub>x</sub>                                       | starch paste-assisted method                                        | 1000                 | 60000 mL g <sup>-1</sup> h <sup>-1</sup>  | 203                  | 224                  |           |
| Ag-MnO <sub>2</sub>                                     | H <sub>2</sub> O <sub>2</sub> assisted treatment method             | 1000                 | 60000 mL g <sup>-1</sup> h <sup>-1</sup>  | 216                  | 225                  | [10]      |
| Ni-MnO <sub>2</sub>                                     | EG reduction strategy                                               | 1000                 | 20000 mL g <sup>-1</sup> h <sup>-1</sup>  | 189                  | 199                  | [11]      |
| Ce <sub>0.03</sub> MnO <sub>x</sub>                     | Redox precipitation                                                 | 1000                 | 20000 mL g <sup>-1</sup> h <sup>-1</sup>  | 215                  | 220                  | [3]       |
| MnO <sub>x</sub> /Co <sub>3</sub> O <sub>4</sub>        | synergistic pyrolysis<br>adsorption-oxidation strategy              | 1000                 | 120000 mL g <sup>-1</sup> h <sup>-1</sup> | 237                  | 242                  | [12]      |
| CuMnO <sub>x</sub>                                      | co-precipitation method                                             | 1000                 | 20000 mL g <sup>-1</sup> h <sup>-1</sup>  | 210                  | 231                  | [13]      |
| MnO <sub>2</sub> -EG                                    | EG reduction strategy                                               | 1000                 | 20000 mL g <sup>-1</sup> h <sup>-1</sup>  | 194                  | 214                  | This work |
| Ce-MnO <sub>2</sub> -EG                                 | EG reduction strategy                                               | 1000                 | 20000 mL g <sup>-1</sup> h <sup>-1</sup>  | 184                  | 197                  | This work |

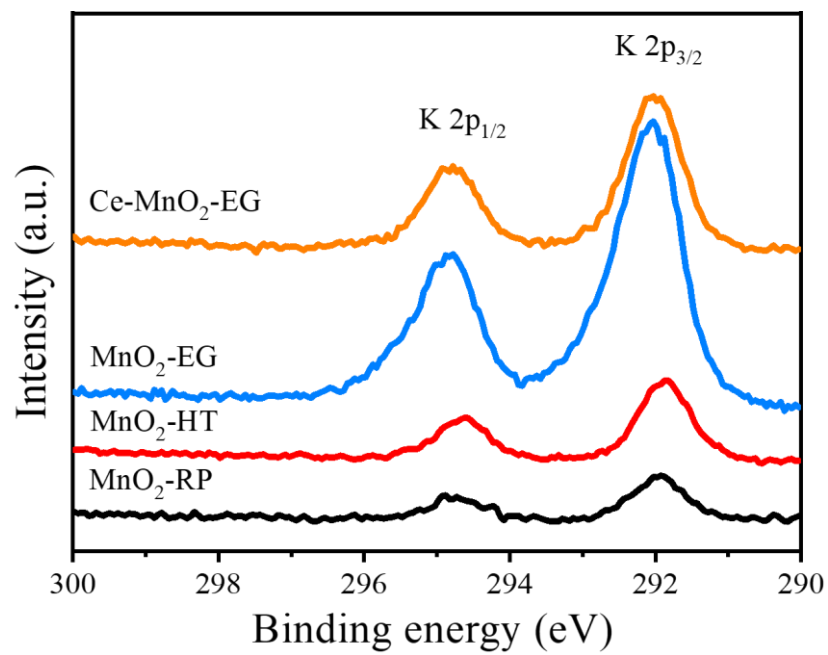

**Fig. S1** K 2p XPS spectra of various MnO<sub>2</sub> and Ce-MnO<sub>2</sub>-EG samples.

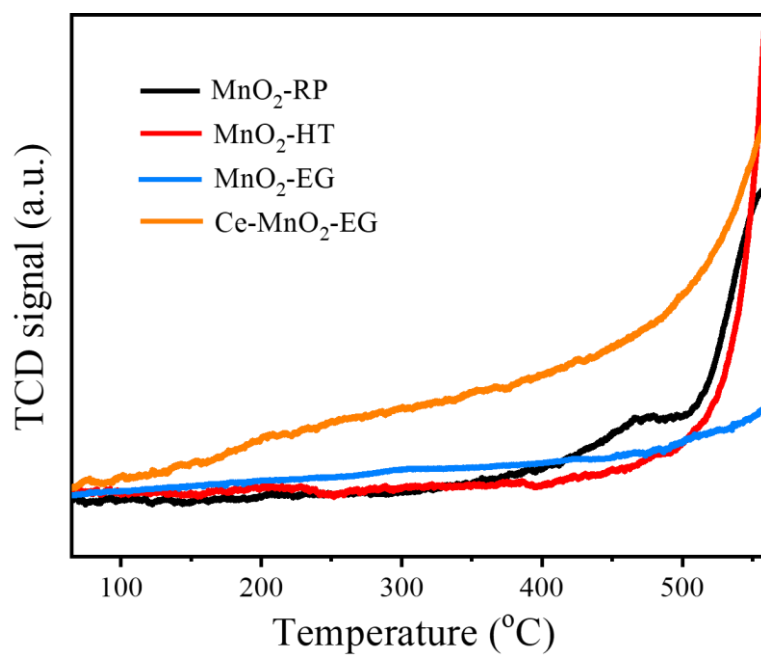

**Fig. S2** Enlarged O<sub>2</sub>-TPD curves of the various catalysts in the low temperature region.

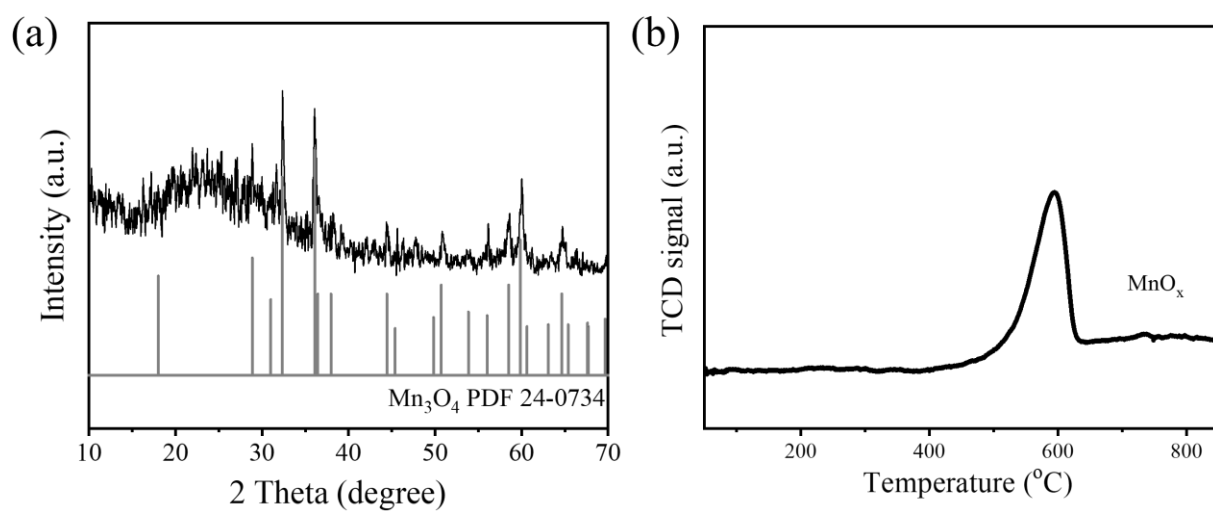

**Fig. S3** (a) XRD pattern and (b) O<sub>2</sub>-TPD profile of MnO<sub>x</sub> reference sample without K content.

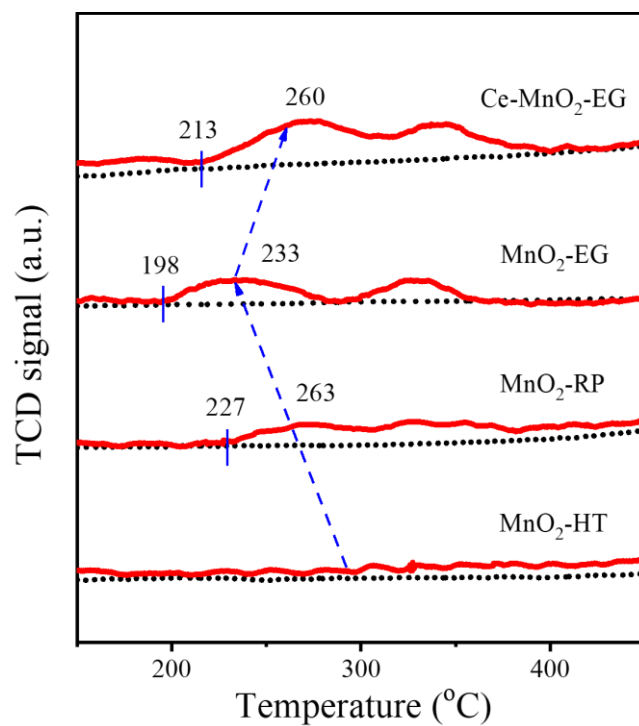

**Fig. S4** Activation-oxidation temperature of toluene to CO<sub>2</sub> based the C<sub>7</sub>H<sub>8</sub>-TPSR testing (without O<sub>2</sub>) for various MnO<sub>2</sub> and Ce-MnO<sub>2</sub>-EG catalysts under He atmosphere.

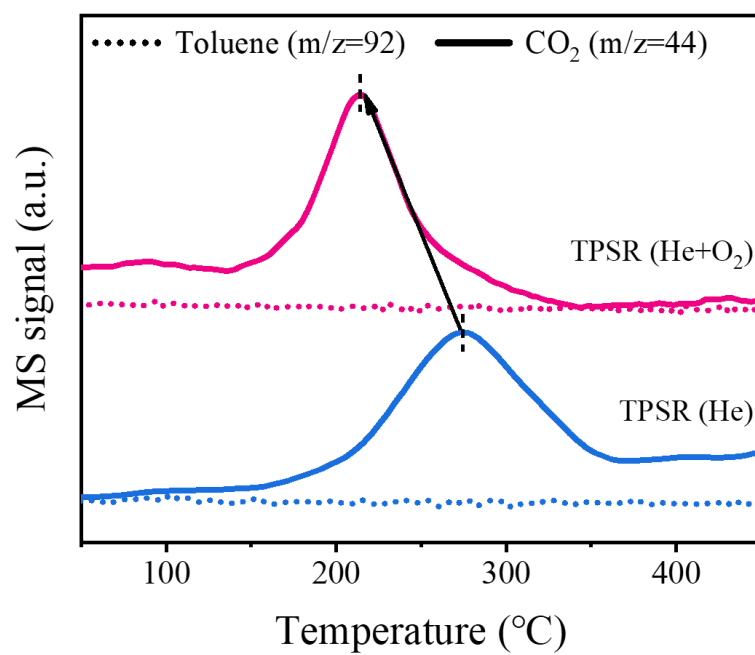

**Fig. S5** Comparison curves of toluene signal ( $m/z = 92$ ) and  $\text{CO}_2$  signal ( $m/z = 44$ ) for  $\text{C}_7\text{H}_8$ -TPSR ( $\text{He} + \text{O}_2$ ) and  $\text{C}_7\text{H}_8$ -TPSR ( $\text{He}$ ) of  $\text{Ce-MnO}_2$ -EG.

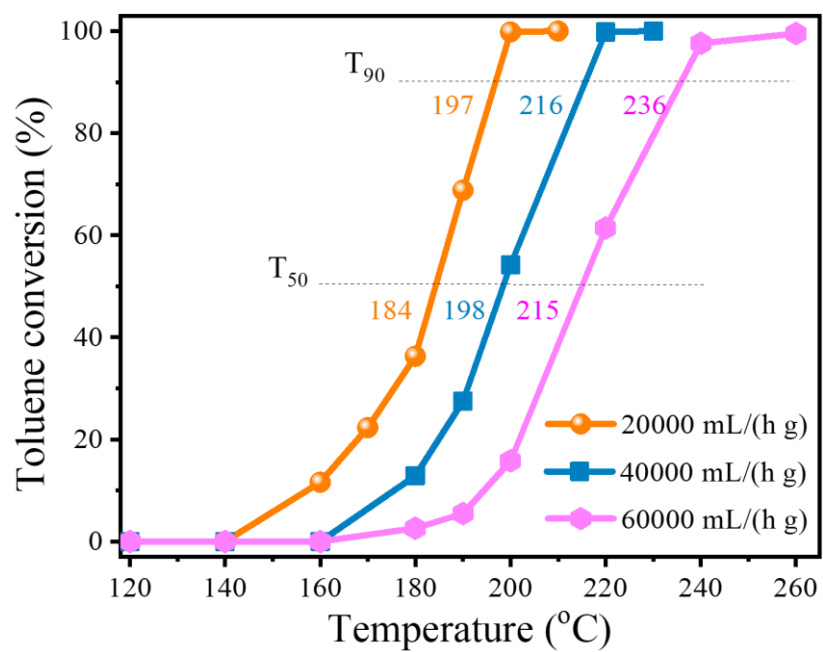

**Fig. S6** Catalytic activities of Ce-MnO<sub>2</sub>-EG catalyst under different WHSV with [C<sub>7</sub>H<sub>8</sub>] = 1000 ppm in air.

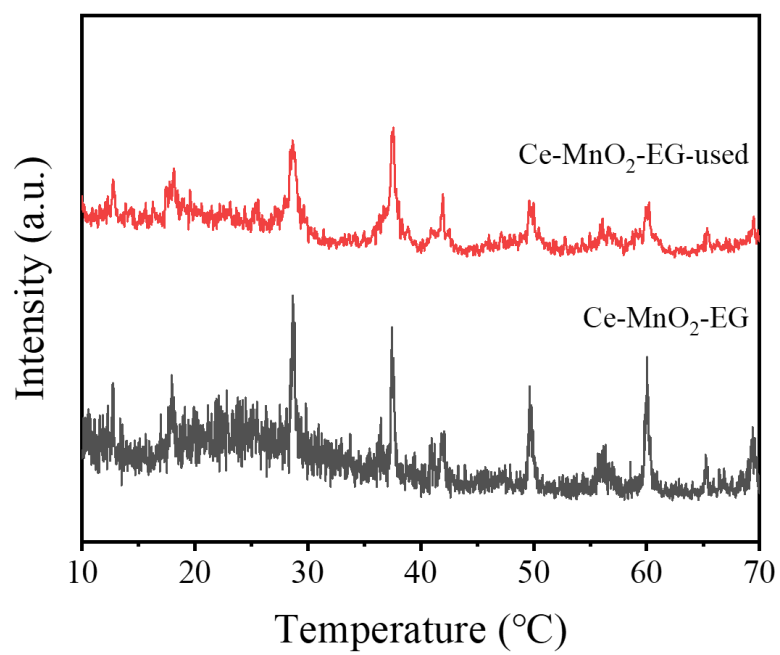

**Fig. S7** XRD patterns of fresh Ce-MnO<sub>2</sub>-EG and Ce-MnO<sub>2</sub>-EG-used samples.

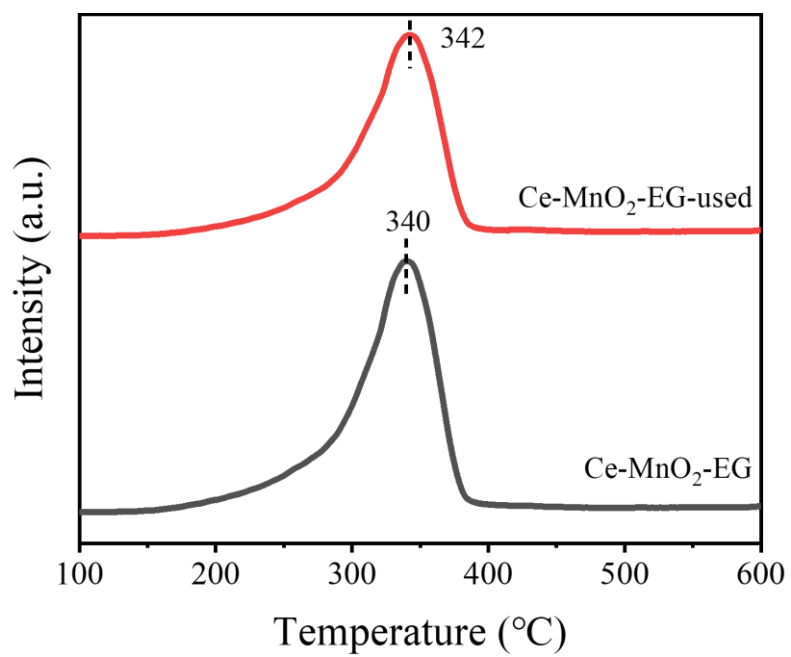

**Fig. S8** H<sub>2</sub>-TPR curves fresh Ce-MnO<sub>2</sub>-EG and Ce-MnO<sub>2</sub>-EG-used catalysts.

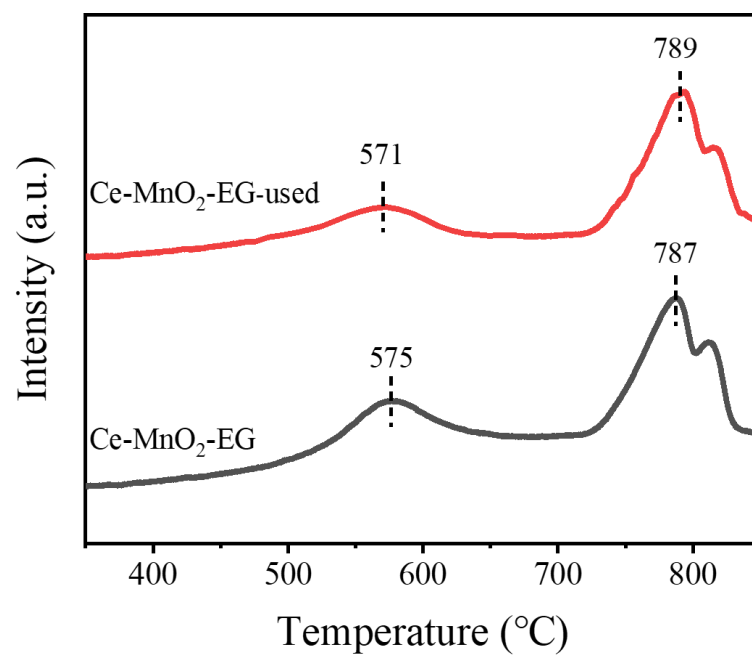

**Fig. S9** O<sub>2</sub>-TPD profiles of fresh Ce-MnO<sub>2</sub>-EG and Ce-MnO<sub>2</sub>-EG-used catalysts.

## References

- [1] X. Zhang, Y. Yang, Q. Zhu, M. Ma, Z. Jiang, X. Liao, C. He, *J. Colloid. Interf. Sci.*, 2021, **598**, 324–338.
- [2] J. Chen, X. Chen, X. Chen, W. Xu, Z. Xu, H. Jia, J. Chen, *Appl. Catal. B: Environ.*, 2018, **224**, 825–835.
- [3] L. Zhao, Z. Zhang, Y. Li, X. Leng, T. Zhang, F. Yuan, X. Niu, Y. Zhu, *Appl. Catal. B: Environ.*, 2019, **245**, 502–512
- [4] Q. Huang, Z. Zhou, B. Lan, M. Sun, C. Sun, L. Yu, *Colloid. Surface. A.*, 2023, **666**, 131302.
- [5] M. Piumetti, D. Fino, N. Russo, *Appl. Catal. B: Environ.*, 2015, **163**, 277–287.
- [6] C. Zhang, M. Li, X. Wang, L. Fan, Y. Dong, Y. Zhu, *J. Chem. Technol. Biot.*, 2021, **97**, 1138-1148.
- [7] Y. Dong, F. Wang, W. Song, P. Wang, C. Zhu, X. Wang, S. Li, X. Li, W. Li, *Chem. Eng. J.*, 2023, **464**, 142740.
- [8] W. Yang, Y. Peng, Y. Wang, H. Liu, Z. Su, W. Yang, J. Chen, W. Si, J. Li, *Appl. Catal. B: Environ.*, 2020, **278**, 119279.
- [9] J. Zhao, P. Wang, J. Wang, C. Liu, J. Wang, *Chem. Eng. J.*, 2023, **464**, 142739.
- [10] W. Yang, X. Zhao, Y. Wang, X. Wang, *Catal. Sci. Technol.*, 2022, **12(19)**, 5932–5941.
- [11] Y. Dong, J. Zhao, J. Zhang, Y. Chen, X. Yang, W. Song, L. Wei, W. Li, *Chem. Eng. J.*, 2020, **388**, 124244.
- [12] D. Han, X. Ma, X. Yang, M. Xiao, H. Sun, L. Ma, *J. Colloid. Interf. Sci.*, 2021, **603**, 695–705.
- [13] C. Xu, S. Dong, T. Chen, H. Liu, X. Zou, M. Ji, *Fuel.*, 2023, **347**, 128401.
